# Supplementary material for: Picturing words? Sensorimotor cortex activation for printed words in child and adult readers
Source: PubMed Central journal article supplement (PMC4271739; doi:10.1016/j.bandl.2014.09.009), 2014-12
Supplement: mmc1.pdf [file mmc1.pdf]

## Appendix A

Table A.1

| <b>Animals</b>    | <b>UK wrd freq</b> | <b>Tools</b>      | <b>UK wrd freq</b> |
|-------------------|--------------------|-------------------|--------------------|
| Bear              | 19                 | Cup               | 59                 |
| Bird              | 42                 | Fork              | 12                 |
| Horse             | 85                 | Knife             | 35                 |
| Lamb              | 15                 | Glasses           | 51                 |
| Penguin           | 4                  | Paintbrush        | 1                  |
| Butterfly         | 5                  | Pan               | 22                 |
| Tiger             | 4                  | Pen               | 19                 |
| Cat               | 41                 | Pencil            | 15                 |
| Cow               | 22                 | Broom             | 6                  |
| Turtle            | 1                  | Brush             | 13                 |
| Deer              | 6                  | Comb              | 10                 |
| Dog               | 70                 | Rubber            | 25                 |
| Duck              | 4                  | Scissors          | 4                  |
| Elephant          | 5                  | Spade             | 3                  |
| Fish              | 83                 | Teapot            | 3                  |
| Zebra             | 1                  | Hammer            | 10                 |
| Frog              | 4                  | Toothbrush        | 2                  |
| Giraffe           | 1                  | Bottle            | 82                 |
| Pig               | 18                 | Violin            | 4                  |
| Rabbit            | 11                 | Key               | 71                 |
| <b>MEAN FREQ:</b> | <b>22.1</b>        | <b>MEAN FREQ:</b> | <b>22.35</b>       |

Table A.1. All printed words included in the study. Only words that are acquired before the age of 7 were included (MRC database Max Planck: [http://www.psy.uwa.edu.au/mrcdatabase/uwa\\_mrc.htm](http://www.psy.uwa.edu.au/mrcdatabase/uwa_mrc.htm)). The tool- and animal words were matched on average number letters, syllables and written word frequency as described in the British version of the Celex2 database (Baayen, Piepenbrock, Gulikers, 1996). The written word frequencies are reported. Examples of word stimuli and related pictures are displayed in Figure 1.

**Table A.2**

| Category preference for pictures or words:                                                             | Nvox | Z <sub>max</sub> | X <sub>mm</sub> | Y <sub>mm</sub> | Z <sub>mm</sub> |
|--------------------------------------------------------------------------------------------------------|------|------------------|-----------------|-----------------|-----------------|
| <b>Adults, tools &gt; animals</b>                                                                      |      |                  |                 |                 |                 |
| <b>Pictures:</b>                                                                                       |      |                  |                 |                 |                 |
| Right occipitoparietal cortex, superior and inferior parietal Cortex, medial and lateral FFG, LOC, MTG | 2770 | 3.8              | 26              | -70             | 30              |
| Left occipitoparietal cortex & superior and inferior parietal cortex (incl. AIP)                       | 2315 | 4.15             | -24             | -76             | 46              |
| Left medial and lateral FFG, LOC, MTG                                                                  | 1472 | 4.48             | -40             | -66             | -6              |
| Left inferior frontal gyrus                                                                            | 1001 | 3.66             | -52             | 16              | 14              |
| Right superior frontal /paracingulate gyrus                                                            | 414  | 3.28             | 14              | 24              | 54              |
| <b>Words:</b>                                                                                          |      |                  |                 |                 |                 |
| Left IFG                                                                                               | 313  | 3.28             | -42             | 36              | 6               |
| Left lateral FFG, LOC, MTG                                                                             | 301  | 3.23             | -46             | -48             | 2               |
| <b>9 to 10, tools &gt; animals</b>                                                                     |      |                  |                 |                 |                 |
| <b>Pictures:</b>                                                                                       |      |                  |                 |                 |                 |
| Left occipitoparietal cortex, superior and inferior parietal cortex (incl. AIP)                        | 2375 | 3.89             | -28             | -82             | 14              |
| Right medial and lateral FFG, LOC, MTG                                                                 | 1366 | 3.94             | 50              | -60             | -8              |
| Right occipitoparietal cortex & superior parietal cortex                                               | 1243 | 3.98             | 24              | -68             | 56              |
| Left lateral FFG, LOC, MTG                                                                             | 691  | 4.52             | -48             | -64             | -12             |
| Anterior IFG                                                                                           | 402  | 3.15             | -38             | 26              | 18              |
| Medial FFG                                                                                             | 352  | 3.71             | -26             | -52             | -14             |
| Precentral Gyrus, posterior IFG                                                                        | 310  | 3.26             | -44             | 6               | 28              |
| <b>Words:</b>                                                                                          |      |                  |                 |                 |                 |
| No significant clusters                                                                                | -    | -                | -               | -               | -               |
| <b>7 to 8, tools &gt; animals</b>                                                                      |      |                  |                 |                 |                 |
| <b>Pictures:</b>                                                                                       |      |                  |                 |                 |                 |
| Left occipitoparietal cortex & superior and inferior parietal cortex (incl. AIP)                       | 5590 | 4.61             | -36             | -52             | 52              |
| Right occipitoparietal cortex & superior and inferior parietal cortex                                  | 3849 | 4.16             | 30              | -78             | 16              |
| Left medial and lateral FFG, LOC, MTG                                                                  | 1613 | 4.5              | -48             | -64             | -8              |
| Right lateral FFG, LOC, MTG                                                                            | 666  | 4.3              | 52              | -60             | -18             |
| Left posterior IFG                                                                                     | 665  | 3.6              | -50             | 6               | 26              |
| Left precentral Gyrus                                                                                  | 410  | 3.64             | -24             | -12             | 50              |
| <b>Words:</b>                                                                                          |      |                  |                 |                 |                 |
| No significant clusters                                                                                | -    | -                | -               | -               | -               |
| <b>Adults, animals &gt; tools</b>                                                                      |      |                  |                 |                 |                 |
| <b>Pictures:</b>                                                                                       |      |                  |                 |                 |                 |
| Bilateral Occipital cortex and posterior FFG, right LOC, left and right lateral FFG (incl. right FFA)  | 9648 | 5.28             | 16              | -90             | -10             |
| <b>Words:</b>                                                                                          |      |                  |                 |                 |                 |
| No significant clusters                                                                                | -    | -                | -               | -               | -               |
| <b>9 to 10, animals &gt; tools</b>                                                                     |      |                  |                 |                 |                 |
| <b>Pictures:</b>                                                                                       |      |                  |                 |                 |                 |
| Bilateral Occipital cortex and posterior FFG                                                           | 6643 | 5.52             | 18              | -94             | 8               |
| Right LOC                                                                                              | 518  | 4.5              | 46              | -76             | -2              |
| <b>Words:</b>                                                                                          |      |                  |                 |                 |                 |
| Left calcarine sulcus                                                                                  | 512  | 3.03             | -20             | -88             | 10              |
| <b>7 to 8, animals &gt; tools</b>                                                                      |      |                  |                 |                 |                 |
| <b>Pictures:</b>                                                                                       |      |                  |                 |                 |                 |
| Bilateral Occipital cortex and posterior FFG, right LOC                                                | 7566 | 5.11             | 18              | -94             | 6               |
| <b>Words:</b>                                                                                          |      |                  |                 |                 |                 |
| No significant clusters                                                                                | -    | -                | -               | -               | -               |

Table A.2. Cluster statistics of all regions displayed in Figure 2 (main text) with a significant average preference for tool pictures, animal pictures, tool words and animal words in 11 7- to 8-year-olds, 10 9- to 10-year-olds and 13 adults. All cluster surpassed a threshold of  $z=2.3$ ,  $p_{\text{cluster}} < 0.05$ , in a whole brain comparison within each age group.

**Figure A.1**

**Supplementary Figure 1**

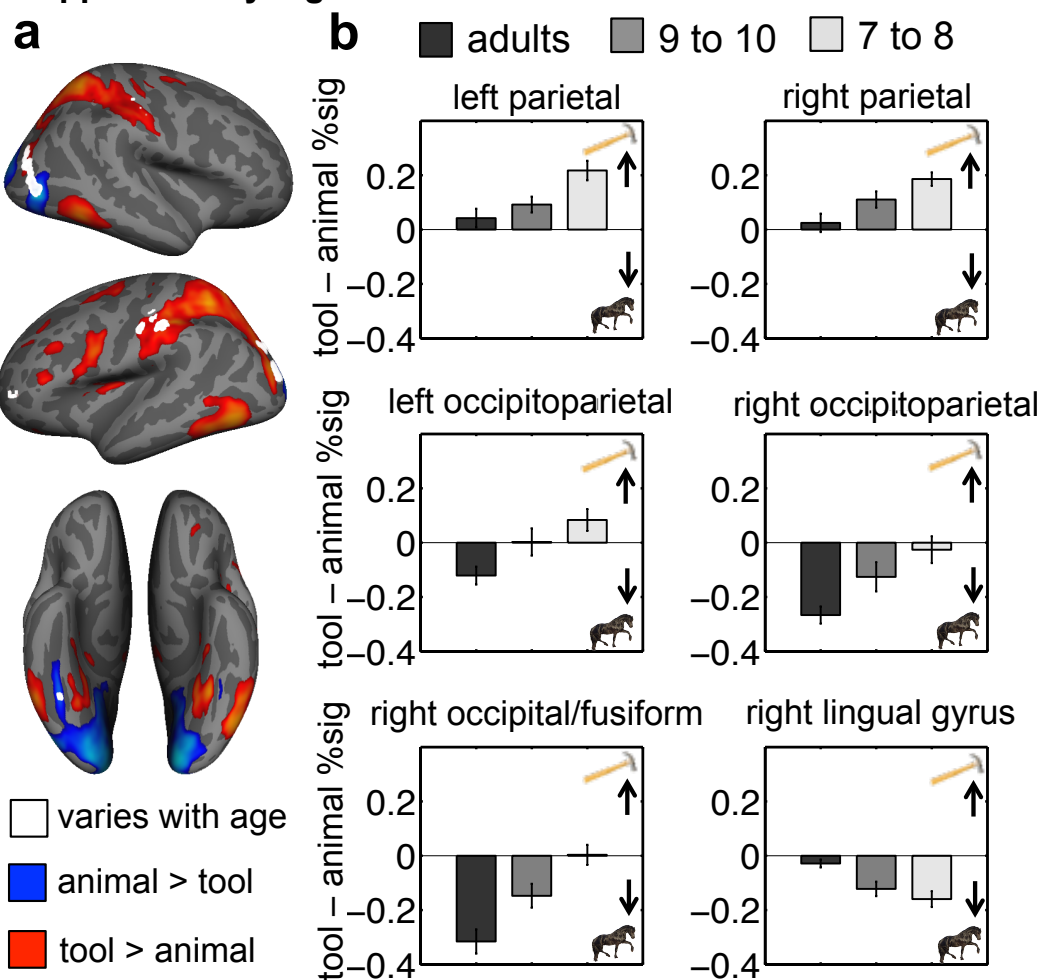

Figure A.1 Areas where the amplitude of picture category selectivity (tool vs fixation – animal vs fixation) varied linearly with age ( $z=2.3$ ,  $p_{\text{cluster}} < 0.05$ ) in a whole brain analysis are displayed (white) on top of a group average activation map ( $n=34$ , all subjects) with animal picture selective regions (blue) and tool picture selective regions (red). B) Graphs visualise the patterns of age-related changes in the white

clusters. Dark grey bars: adults, medium grey bars: 9- to 10-year-olds, light grey bars: 7- to 8-year-olds. The amplitude of tool picture selectivity in the left and right superior- and intraparietal cortex decreased with age. Selectivity for animal pictures in the right fusiform gyrus, around human FFA and in the right and left occipitoparietal cortex emerged with age, in line with previous reports of protracted specialisation for human faces in these regions. The amplitude of animal picture selectivity in the lingual gyrus decreased with age. Thus, there were age-related decreases and increases in the amplitude of animal- and tool picture selectivity depending on cortical location and picture category. In contrast, Dekker et al. (2011) reported developmental consistency in tool picture selectivity 6 years onwards. The different findings might be explained by (a) different depth of object property processing in the current categorisation task compared to the passive viewing task used by Dekker et al. (2011) (b) different choice of baseline (scrambled objects vs fixation).

**Table A.3**

| <b>Age (N=34) correlates with tool pictures &gt; animal pictures:</b> | Nvox | Z <sub>max</sub> | X <sub>mm</sub> | Y <sub>mm</sub> | Z <sub>mm</sub> |
|-----------------------------------------------------------------------|------|------------------|-----------------|-----------------|-----------------|
| <i>left frontal pole</i>                                              | 336  | 3.69             | -24             | 70              | -8              |
| <i>right lingual gyrus</i>                                            | 308  | 3.64             | 12              | -76             | -2              |
| <i>right Occipitoparietal</i>                                         | 825  | 4.45             | 34              | -74             | 10              |
| <i>left superior and inferior parietal</i>                            | 669  | 3.59             | -36             | -58             | 64              |
| <i>left Occipitoparietal</i>                                          | 559  | 2.95             | -18             | -104            | 14              |
| <i>right superior and inferior parietal</i>                           | 374  | 1.77             | 28              | -58             | 70              |
| <i>right Occipital/Fusiform</i>                                       | 343  | 1.55             | 44              | -56             | -24             |

Table A.3. Cluster statistics of regions where the category preference for tools or animals (contrast: tool pictures vs fixation – animal pictures vs fixation), changed linearly with age from childhood to adulthood. All cluster surpassed a threshold of  $z=2.3$ ,  $p_{\text{cluster}} < 0.05$  and are depicted in Fig. S2 (white).
