# Supplementary material for: Picturing words? Sensorimotor cortex activation for printed words in child and adult readers
Source: PubMed Central journal article supplement (PMC4271739; doi:10.1016/j.bandl.2014.09.009), 2014-12

## Appendix C

Graphs display mean % signal change and standard errors, for tool- (red) and animal words (blue) versus fixation, within picture category selective voxels in spherical ROIs of each group (differential responses computed within subjects are displayed in Figure 3).

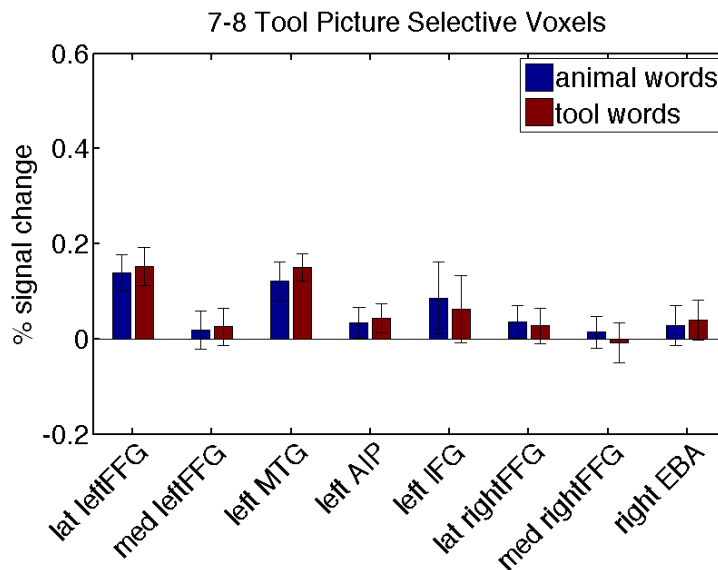

\* =  $p < 0.05$   
\* =  $p < 0.1$   
in paired t-test

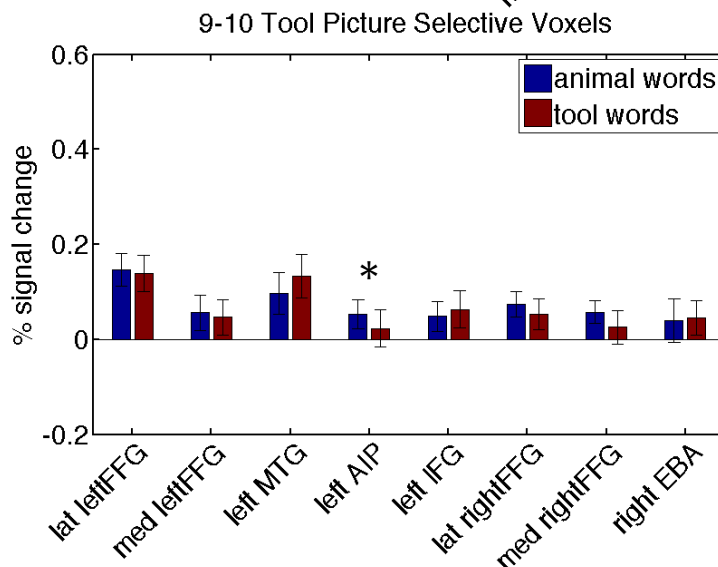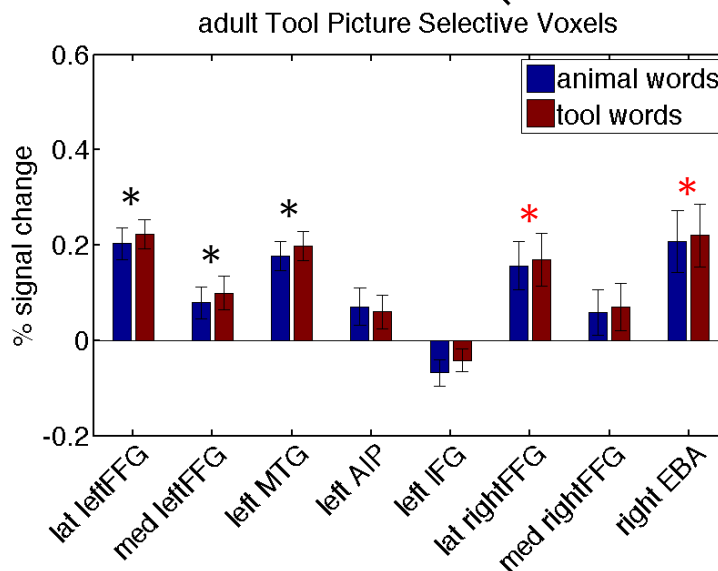

7-8 Animal Picture Selective Voxels

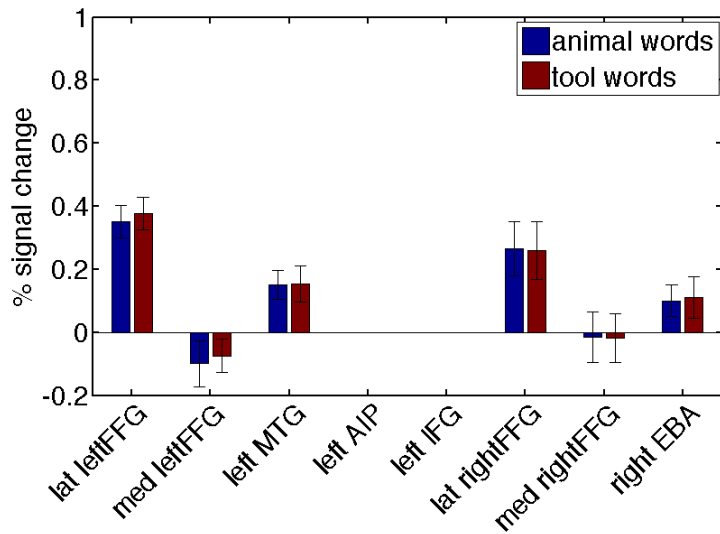

9-10 Animal Picture Selective Voxels

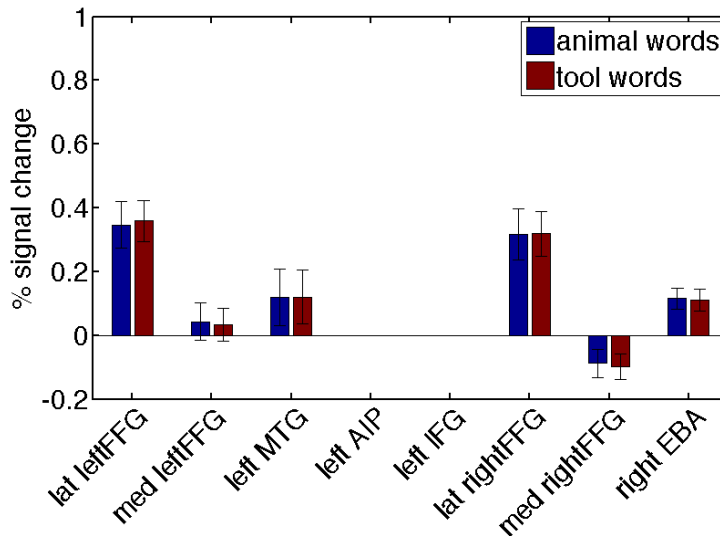

adult Animal Picture Selective Voxels

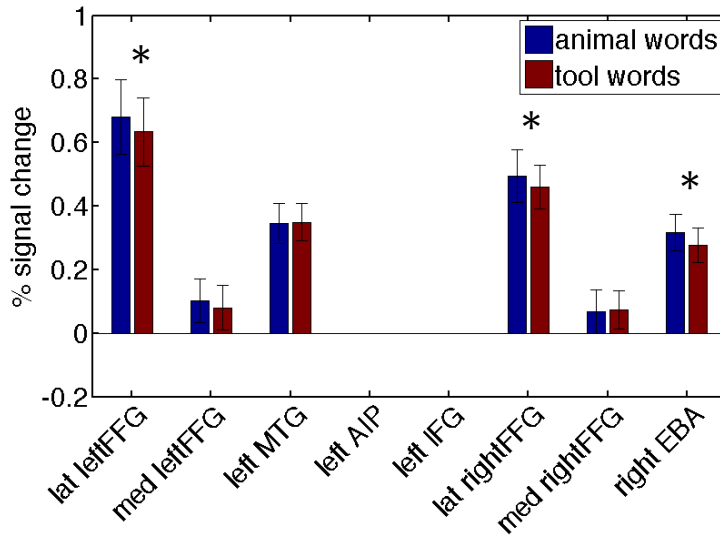

Supplement: mmc3.pdf [file mmc3.pdf]
